# Supplementary material
Source: Research Square preprint supplement (doi:10.21203/rs.3.rs-10003466/v1)
Supplement: Supplementary file 1 [file 46a9b70cf3254f109b4ef862.xlsx]

## Sheet: 28-CR - 28-TR
KO_ID (28-CR - 28-TR)	Label	description
K18093	1	imipenem/basic amino acid-specific outer membrane pore [EC:3.4.21.-]
K11525	2	methyl-accepting chemotaxis protein PixJ
K13021	3	MFS transporter, ACS family, tartrate transporter
K02511	4	MFS transporter, ACS family, 4-hydroxyphenylacetate permease
K10014	5	histidine transport system substrate-binding protein
K10013	6	lysine/arginine/ornithine transport system substrate-binding protein
K07345	7	major type 1 subunit fimbrin (pilin)
K11903	8	type VI secretion system secreted protein Hcp
K15540	9	chaperone protein EcpD
K15125	10	filamentous hemagglutinin
K03749	11	DedD protein
K10024	12	arginine/ornithine transport system permease protein
K21699	13	LysR family transcriptional regulator, transcriptional activator for bauABCD operon
K03230	14	type III secretion protein V
K11891	15	type VI secretion system protein ImpL
K11906	16	type VI secretion system protein VasD
K03219	17	type III secretion protein C
K16235	18	S-methylmethionine transporter
K10016	19	histidine transport system permease protein
K16094	20	bacitracin synthase 2
K07326	21	hemolysin activation/secretion protein
K21825	22	AraC family transcriptional regulator, L-arginine-responsive activator
K09950	23	uncharacterized protein
K01505	24	1-aminocyclopropane-1-carboxylate deaminase [EC:3.5.99.7]
K18100	25	rhamnosyltransferase subunit A [EC:2.4.1.-]
K10015	26	histidine transport system permease protein
K03225	27	type III secretion protein Q
K03806	28	N-acetyl-anhydromuramoyl-L-alanine amidase [EC:3.5.1.28]
K19303	29	murein DD-endopeptidase [EC:3.4.-.-]
K22219	30	dibenzothiophene monooxygenase [EC:1.14.14.21]
K01992	31	ABC-2 type transport system permease protein
K03296	32	hydrophobic/amphiphilic exporter-1 (mainly G- bacteria), HAE1 family
K07315	33	phosphoserine phosphatase RsbU/P [EC:3.1.3.3]
K00019	34	3-hydroxybutyrate dehydrogenase [EC:1.1.1.30]
K00128	35	aldehyde dehydrogenase (NAD+) [EC:1.2.1.3]
K02051	36	NitT/TauT family transport system substrate-binding protein
K18320	37	transposase, IS6 family
K16137	38	TetR/AcrR family transcriptional regulator, transcriptional repressor for nem operon
K02013	39	iron complex transport system ATP-binding protein [EC:3.6.3.34]
K21023	40	diguanylate cyclase [EC:2.7.7.65]
K00249	41	acyl-CoA dehydrogenase [EC:1.3.8.7]
K06147	42	ATP-binding cassette, subfamily B, bacterial
K00046	43	gluconate 5-dehydrogenase [EC:1.1.1.69]
K02004	44	putative ABC transport system permease protein
K12132	45	eukaryotic-like serine/threonine-protein kinase [EC:2.7.11.1]
K07498	46	putative transposase
K02483	47	two-component system, OmpR family, response regulator
K00038	48	3alpha(or 20beta)-hydroxysteroid dehydrogenase [EC:1.1.1.53]
K07506	49	AraC family transcriptional regulator
K02032	50	peptide/nickel transport system ATP-binding protein
K02049	51	NitT/TauT family transport system ATP-binding protein
K07124	52	uncharacterized protein
K02529	53	LacI family transcriptional regulator
K02031	54	peptide/nickel transport system ATP-binding protein
K00344	55	NADPH2:quinone reductase [EC:1.6.5.5]
K02003	56	putative ABC transport system ATP-binding protein
K07497	57	putative transposase
K03088	58	RNA polymerase sigma-70 factor, ECF subfamily
K01990	59	ABC-2 type transport system ATP-binding protein
K00059	60	3-oxoacyl-[acyl-carrier protein] reductase [EC:1.1.1.100]

## Sheet: 35-CR - 35-TR
KO_ID (35-CR - 35-TR)	Label	description
K03285	1	general bacterial porin, GBP family
K02032	2	peptide/nickel transport system ATP-binding protein
K07483	3	transposase
K01995	4	branched-chain amino acid transport system ATP-binding protein
K03776	5	aerotaxis receptor
K01999	6	branched-chain amino acid transport system substrate-binding protein
K00666	7	fatty-acyl-CoA synthase [EC:6.2.1.-]
K16135	8	LysR family transcriptional regulator, transcriptional activator for dmlA
K03761	9	MFS transporter, MHS family, alpha-ketoglutarate permease
K08720	10	outer membrane protein OmpU
K05874	11	methyl-accepting chemotaxis protein I, serine sensor receptor
K07484	12	transposase
K05875	13	methyl-accepting chemotaxis protein II, aspartate sensor receptor
K03762	14	MFS transporter, MHS family, proline/betaine transporter
K18900	15	LysR family transcriptional regulator, regulator for bpeEF and oprC
K03719	16	Lrp/AsnC family transcriptional regulator, leucine-responsive regulatory protein
K11904	17	type VI secretion system secreted protein VgrG
K01998	18	branched-chain amino acid transport system permease protein
K01897	19	long-chain acyl-CoA synthetase [EC:6.2.1.3]
K03406	20	methyl-accepting chemotaxis protein
K03566	21	LysR family transcriptional regulator, glycine cleavage system transcriptional activator
K02029	22	polar amino acid transport system permease protein
K00249	23	acyl-CoA dehydrogenase [EC:1.3.8.7]
K13021	24	MFS transporter, ACS family, tartrate transporter
K02010	25	iron(III) transport system ATP-binding protein [EC:3.6.3.30]
K13614	26	polyketide synthase PksN
K07345	27	major type 1 subunit fimbrin (pilin)
K01692	28	enoyl-CoA hydratase [EC:4.2.1.17]
K05800	29	Lrp/AsnC family transcriptional regulator
K02364	30	enterobactin synthetase component F [EC:6.3.2.14]
K02050	31	NitT/TauT family transport system permease protein
K03111	32	single-strand DNA-binding protein
K01652	33	acetolactate synthase I/II/III large subunit [EC:2.2.1.6]
K03520	34	aerobic carbon-monoxide dehydrogenase large subunit [EC:1.2.5.3]
K00549	35	5-methyltetrahydropteroyltriglutamate--homocysteine methyltransferase [EC:2.1.1.14]
K21021	36	diguanylate cyclase [EC:2.7.7.65]
K13979	37	uncharacterized zinc-type alcohol dehydrogenase-like protein [EC:1.-.-.-]
K13590	38	diguanylate cyclase [EC:2.7.7.65]
K18967	39	diguanylate cyclase [EC:2.7.7.65]
K01990	40	ABC-2 type transport system ATP-binding protein
K05882	41	aryl-alcohol dehydrogenase (NADP+) [EC:1.1.1.91]
K02482	42	two-component system, NtrC family, sensor kinase [EC:2.7.13.3]
K01187	43	alpha-glucosidase [EC:3.2.1.20]
K16137	44	TetR/AcrR family transcriptional regulator, transcriptional repressor for nem operon
K02488	45	two-component system, cell cycle response regulator [EC:2.7.7.65]
K00001	46	alcohol dehydrogenase [EC:1.1.1.1]
K07407	47	alpha-galactosidase [EC:3.2.1.22]
K07315	48	phosphoserine phosphatase RsbU/P [EC:3.1.3.3]
K07506	49	AraC family transcriptional regulator
K07124	50	uncharacterized protein
K02004	51	putative ABC transport system permease protein
K00344	52	NADPH2:quinone reductase [EC:1.6.5.5]
K02529	53	LacI family transcriptional regulator
K02051	54	NitT/TauT family transport system substrate-binding protein
K12132	55	eukaryotic-like serine/threonine-protein kinase [EC:2.7.11.1]
K21023	56	diguanylate cyclase [EC:2.7.7.65]
K18320	57	transposase, IS6 family
K07498	58	putative transposase
K03088	59	RNA polymerase sigma-70 factor, ECF subfamily
K00059	60	3-oxoacyl-[acyl-carrier protein] reductase [EC:1.1.1.100]

## Sheet: 42-CR – 42-TR
KO_ID (42-CR – 42-TR)	Label	description
K02031	1	peptide/nickel transport system ATP-binding protein
K02032	2	peptide/nickel transport system ATP-binding protein
K03285	3	general bacterial porin, GBP family
K07483	4	transposase
K00666	5	fatty-acyl-CoA synthase [EC:6.2.1.-]
K03776	6	aerotaxis receptor
K16135	7	LysR family transcriptional regulator, transcriptional activator for dmlA
K01897	8	long-chain acyl-CoA synthetase [EC:6.2.1.3]
K02029	9	polar amino acid transport system permease protein
K05874	10	methyl-accepting chemotaxis protein I, serine sensor receptor
K01692	11	enoyl-CoA hydratase [EC:4.2.1.17]
K08720	12	outer membrane protein OmpU
K03719	13	Lrp/AsnC family transcriptional regulator, leucine-responsive regulatory protein
K03761	14	MFS transporter, MHS family, alpha-ketoglutarate permease
K05875	15	methyl-accepting chemotaxis protein II, aspartate sensor receptor
K02010	16	iron(III) transport system ATP-binding protein [EC:3.6.3.30]
K03566	17	LysR family transcriptional regulator, glycine cleavage system transcriptional activator
K18900	18	LysR family transcriptional regulator, regulator for bpeEF and oprC
K10112	19	multiple sugar transport system ATP-binding protein
K02052	20	putative spermidine/putrescine transport system ATP-binding protein
K03762	21	MFS transporter, MHS family, proline/betaine transporter
K11904	22	type VI secretion system secreted protein VgrG
K07484	23	transposase
K02033	24	peptide/nickel transport system permease protein
K15866	25	2-(1,2-epoxy-1,2-dihydrophenyl)acetyl-CoA isomerase [EC:5.3.3.18]
K13892	26	glutathione transport system ATP-binding protein
K00135	27	succinate-semialdehyde dehydrogenase / glutarate-semialdehyde dehydrogenase [EC:1.2.1.16 1.2.1.79 1.2.1.20]
K13614	28	polyketide synthase PksN
K13021	29	MFS transporter, ACS family, tartrate transporter
K10441	30	ribose transport system ATP-binding protein [EC:3.6.3.17]
K05275	31	pyridoxine 4-dehydrogenase [EC:1.1.1.65]
K01811	32	alpha-D-xyloside xylohydrolase [EC:3.2.1.177]
K03929	33	para-nitrobenzyl esterase [EC:3.1.1.-]
K14596	34	zeaxanthin glucosyltransferase [EC:2.4.1.276]
K21019	35	diguanylate cyclase [EC:2.7.7.65]
K00384	36	thioredoxin reductase (NADPH) [EC:1.8.1.9]
K13924	37	two-component system, chemotaxis family, CheB/CheR fusion protein [EC:2.1.1.80 3.1.1.61]
K03182	38	4-hydroxy-3-polyprenylbenzoate decarboxylase [EC:4.1.1.98]
K03294	39	basic amino acid/polyamine antiporter, APA family
K07789	40	multidrug efflux pump
K05343	41	maltose alpha-D-glucosyltransferase / alpha-amylase [EC:5.4.99.16 3.2.1.1]
K13483	42	xanthine dehydrogenase YagT iron-sulfur-binding subunit
K07788	43	multidrug efflux pump
K07114	44	Ca-activated chloride channel homolog
K02668	45	two-component system, NtrC family, sensor histidine kinase PilS [EC:2.7.13.3]
K21021	46	diguanylate cyclase [EC:2.7.7.65]
K11177	47	xanthine dehydrogenase YagR molybdenum-binding subunit [EC:1.17.1.4]
K01652	48	acetolactate synthase I/II/III large subunit [EC:2.2.1.6]
K13590	49	diguanylate cyclase [EC:2.7.7.65]
K18967	50	diguanylate cyclase [EC:2.7.7.65]
K01187	51	alpha-glucosidase [EC:3.2.1.20]
K00549	52	5-methyltetrahydropteroyltriglutamate--homocysteine methyltransferase [EC:2.1.1.14]
K02488	53	two-component system, cell cycle response regulator [EC:2.7.7.65]
K02482	54	two-component system, NtrC family, sensor kinase [EC:2.7.13.3]
K03296	55	hydrophobic/amphiphilic exporter-1 (mainly G- bacteria), HAE1 family
K00001	56	alcohol dehydrogenase [EC:1.1.1.1]
K12132	57	eukaryotic-like serine/threonine-protein kinase [EC:2.7.11.1]
K21023	58	diguanylate cyclase [EC:2.7.7.65]
K02004	59	putative ABC transport system permease protein
K03088	60	RNA polymerase sigma-70 factor, ECF subfamily

## Sheet: CE – TE
KO_ID (CE – TE)	Label	description
K02483	1	two-component system, OmpR family, response regulator
K07126	2	uncharacterized protein
K09810	3	lipoprotein-releasing system ATP-binding protein [EC:3.6.3.-]
K03560	4	biopolymer transport protein TolR
K00382	5	dihydrolipoamide dehydrogenase [EC:1.8.1.4]
K07718	6	two-component system, sensor histidine kinase YesM [EC:2.7.13.3]
K03185	7	2-octaprenyl-6-methoxyphenol hydroxylase [EC:1.14.13.-]
K07647	8	two-component system, OmpR family, sensor histidine kinase TorS [EC:2.7.13.3]
K03562	9	biopolymer transport protein TolQ
K09691	10	lipopolysaccharide transport system ATP-binding protein
K21085	11	diguanylate cyclase [EC:2.7.7.65]
K11070	12	spermidine/putrescine transport system permease protein
K09461	13	anthraniloyl-CoA monooxygenase [EC:1.14.13.40]
K01821	14	4-oxalocrotonate tautomerase [EC:5.3.2.6]
K18893	15	ATP-binding cassette, subfamily B, multidrug efflux pump
K20974	16	two-component system, sensor histidine kinase [EC:2.7.13.3]
K15521	17	D-inositol-3-phosphate glycosyltransferase [EC:2.4.1.250]
K05527	18	BolA family transcriptional regulator, general stress-responsive regulator
K04772	19	serine protease DegQ [EC:3.4.21.-]
K04752	20	nitrogen regulatory protein P-II 2
K01912	21	phenylacetate-CoA ligase [EC:6.2.1.30]
K09689	22	capsular polysaccharide transport system ATP-binding protein [EC:3.6.3.38]
K00575	23	chemotaxis protein methyltransferase CheR [EC:2.1.1.80]
K00266	24	glutamate synthase (NADPH/NADH) small chain [EC:1.4.1.13 1.4.1.14]
K03549	25	KUP system potassium uptake protein
K13584	26	two-component system, cell cycle response regulator CtrA
K00937	27	polyphosphate kinase [EC:2.7.4.1]
K15034	28	ribosome-associated protein
K19746	29	D-arginine dehydrogenase [EC:1.4.99.6]
K13874	30	L-arabinonolactonase [EC:3.1.1.15]
K18907	31	GntR family transcriptional regulator, regulator for abcA and norABC
K07306	32	anaerobic dimethyl sulfoxide reductase subunit A [EC:1.8.5.3]
K05791	33	tellurium resistance protein TerZ
K01425	34	glutaminase [EC:3.5.1.2]
K17716	35	UDP-glucose 4-epimerase [EC:5.1.3.2]
K02476	36	two-component system, CitB family, sensor kinase [EC:2.7.13.3]
K01466	37	allantoinase [EC:3.5.2.5]
K05350	38	beta-glucosidase [EC:3.2.1.21]
K19955	39	alcohol dehydrogenase [EC:1.1.1.-]
K00903	40	protein-tyrosine kinase [EC:2.7.10.2]
K06381	41	stage II sporulation protein D
K01176	42	alpha-amylase [EC:3.2.1.1]
K16125	43	syringomycin synthetase protein SyrE
K14647	44	minor extracellular serine protease Vpr [EC:3.4.21.-]
K19428	45	sugar transferase EpsL [EC:2.-.-.-]
K03297	46	small multidrug resistance pump
K16094	47	bacitracin synthase 2
K17733	48	peptidoglycan LD-endopeptidase CwlK [EC:3.4.-.-]
K17734	49	serine protease AprX [EC:3.4.21.-]
K00008	50	L-iditol 2-dehydrogenase [EC:1.1.1.14]
K16130	51	microcystin synthetase protein McyA
K18349	52	two-component system, OmpR family, response regulator VanR
K02205	53	arginine/ornithine permease
K16416	54	myxalamid-type nonribosomal peptide synthetase MxaA
K06595	55	heam-based aerotactic trancducer
K16235	56	S-methylmethionine transporter
K17763	57	rsbT co-antagonist protein RsbR
K03657	58	DNA helicase II / ATP-dependent DNA helicase PcrA [EC:3.6.4.12]
K15656	59	surfactin family lipopeptide synthetase C
K15667	60	fengycin family lipopeptide synthetase D

## Sheet: CR – TR
KO_ID (CR – TR)	Label	description
K01999	1	branched-chain amino acid transport system substrate-binding protein
K21572	2	starch-binding outer membrane protein, SusD/RagB family
K16079	3	outer membrane immunogenic protein
K01995	4	branched-chain amino acid transport system ATP-binding protein
K21573	5	TonB-dependent starch-binding outer membrane protein SusC
K01998	6	branched-chain amino acid transport system permease protein
K01996	7	branched-chain amino acid transport system ATP-binding protein
K03088	8	RNA polymerase sigma-70 factor, ECF subfamily
K03406	9	methyl-accepting chemotaxis protein
K01768	10	adenylate cyclase [EC:4.6.1.1]
K13587	11	two-component system, cell cycle sensor histidine kinase and response regulator CckA [EC:2.7.13.3]
K01997	12	branched-chain amino acid transport system permease protein
K02051	13	NitT/TauT family transport system substrate-binding protein
K02482	14	two-component system, NtrC family, sensor kinase [EC:2.7.13.3]
K00666	15	fatty-acyl-CoA synthase [EC:6.2.1.-]
K07749	16	formyl-CoA transferase [EC:2.8.3.16]
K03413	17	two-component system, chemotaxis family, chemotaxis protein CheY
K10125	18	two-component system, NtrC family, C4-dicarboxylate transport sensor histidine kinase DctB [EC:2.7.13.3]
K01897	19	long-chain acyl-CoA synthetase [EC:6.2.1.3]
K02050	20	NitT/TauT family transport system permease protein
K14986	21	two-component system, LuxR family, sensor kinase FixL [EC:2.7.13.3]
K00799	22	glutathione S-transferase [EC:2.5.1.18]
K19661	23	two-component system, NtrC family, sensor histidine kinase HupT/HoxJ [EC:2.7.13.3]
K07165	24	transmembrane sensor
K15583	25	oligopeptide transport system ATP-binding protein
K07486	26	transposase
K13892	27	glutathione transport system ATP-binding protein
K03520	28	aerobic carbon-monoxide dehydrogenase large subunit [EC:1.2.5.3]
K15866	29	2-(1,2-epoxy-1,2-dihydrophenyl)acetyl-CoA isomerase [EC:5.3.3.18]
K01692	30	enoyl-CoA hydratase [EC:4.2.1.17]
K02000	31	glycine betaine/proline transport system ATP-binding protein [EC:3.6.3.32]
K16787	32	energy-coupling factor transport system ATP-binding protein [EC:3.6.3.-]
K07712	33	two-component system, NtrC family, nitrogen regulation response regulator GlnG
K00303	34	sarcosine oxidase, subunit beta [EC:1.5.3.1]
K02057	35	simple sugar transport system permease protein
K21826	36	AraC family transcriptional regulator, glycine betaine-responsive activator
K02015	37	iron complex transport system permease protein
K07657	38	two-component system, OmpR family, phosphate regulon response regulator PhoB
K03719	39	Lrp/AsnC family transcriptional regulator, leucine-responsive regulatory protein
K03776	40	aerotaxis receptor
K05875	41	methyl-accepting chemotaxis protein II, aspartate sensor receptor
K11072	42	spermidine/putrescine transport system ATP-binding protein [EC:3.6.3.31]
K00382	43	dihydrolipoamide dehydrogenase [EC:1.8.1.4]
K05874	44	methyl-accepting chemotaxis protein I, serine sensor receptor
K02529	45	LacI family transcriptional regulator
K03566	46	LysR family transcriptional regulator, glycine cleavage system transcriptional activator
K18967	47	diguanylate cyclase [EC:2.7.7.65]
K10439	48	ribose transport system substrate-binding protein
K13069	49	diguanylate cyclase [EC:2.7.7.65]
K10441	50	ribose transport system ATP-binding protein [EC:3.6.3.17]
K03285	51	general bacterial porin, GBP family
K00130	52	betaine-aldehyde dehydrogenase [EC:1.2.1.8]
K13590	53	diguanylate cyclase [EC:2.7.7.65]
K00128	54	aldehyde dehydrogenase (NAD+) [EC:1.2.1.3]
K00135	55	succinate-semialdehyde dehydrogenase / glutarate-semialdehyde dehydrogenase [EC:1.2.1.16 1.2.1.79 1.2.1.20]
K02056	56	simple sugar transport system ATP-binding protein [EC:3.6.3.17]
K02029	57	polar amino acid transport system permease protein
K02488	58	two-component system, cell cycle response regulator [EC:2.7.7.65]
K10440	59	ribose transport system permease protein
K02028	60	polar amino acid transport system ATP-binding protein [EC:3.6.3.21]
