# Supplementary material
Source: Research Square preprint supplement (doi:10.21203/rs.3.rs-10003466/v1)
Supplement: Supplementary file 2 [file 551be4e1014e5b8a69a2a9af.xlsx]

## Sheet: 28-CR - 28-TR
KO_ID (28-CR – 28-TR)	Label	description
K18297	1	mexT; LysR family transcriptional regulator, mexEF-oprN operon transcriptional activator
K03863	2	vanB; vanillate monooxygenase ferredoxin subunit
K19295	3	algJ; alginate O-acetyltransferase complex protein AlgJ
K07733	4	alpA; prophage regulatory protein
K12266	5	norR; anaerobic nitric oxide reductase transcription regulator
K03577	6	acrR, smeT; TetR/AcrR family transcriptional regulator, acrAB operon repressor
K03503	7	umuD; DNA polymerase V [EC:3.4.21.-]
K00243	8	K00243; uncharacterized protein
K06970	9	rlmF; 23S rRNA (adenine1618-N6)-methyltransferase [EC:2.1.1.181]
K05819	10	mhpT; MFS transporter, AAHS family, 3-hydroxyphenylpropionic acid transporter
K19290	11	alg8; mannuronan synthase [EC:2.4.1.33]
K05358	12	quiA; quinate dehydrogenase (quinone) [EC:1.1.5.8]
K05306	13	phnX; phosphonoacetaldehyde hydrolase [EC:3.11.1.1]
K13490	14	wspE; two-component system, chemotaxis family, sensor histidine kinase and response regulator WspE
K11384	15	algB; two-component system, NtrC family, response regulator AlgB
K05297	16	rubB, alkT; rubredoxin---NAD+ reductase [EC:1.18.1.1]
K11475	17	vanR; GntR family transcriptional regulator, vanillate catabolism transcriptional regulator
K06214	18	csgG; curli production assembly/transport component CsgG
K07589	19	folX; D-erythro-7,8-dihydroneopterin triphosphate epimerase [EC:5.1.99.7]
K07394	20	K07394; SM-20-related protein
K11905	21	K11905; type VI secretion system protein
K05526	22	astE; succinylglutamate desuccinylase [EC:3.5.1.96]
K11910	23	vasJ; type VI secretion system protein VasJ
K01708	24	garD; galactarate dehydratase [EC:4.2.1.42]
K09859	25	K09859; uncharacterized protein
K09003	26	K09003; uncharacterized protein
K09141	27	K09141; uncharacterized protein
K12984	28	waaE, kdtX; (heptosyl)LPS beta-1,4-glucosyltransferase [EC:2.4.1.-]
K02839	29	prfH; peptide chain release factor
K03385	30	nrfA; nitrite reductase (cytochrome c-552) [EC:1.7.2.2]
K14949	31	pknG; serine/threonine-protein kinase PknG [EC:2.7.11.1]
K15855	32	csxA; exo-1,4-beta-D-glucosaminidase [EC:3.2.1.165]
K00082	33	ribD2; 5-amino-6-(5-phosphoribosylamino)uracil reductase [EC:1.1.1.193]
K10233	34	aglF, ggtC; alpha-glucoside transport system permease protein
K15981	35	CYP125A; cholest-4-en-3-one 26-monooxygenase [EC:1.14.13.141]
K01222	36	E3.2.1.86A, celF; 6-phospho-beta-glucosidase [EC:3.2.1.86]
K18917	37	mrx1; mycoredoxin [EC:1.20.4.3]
K10234	38	aglG, ggtD; alpha-glucoside transport system permease protein
K10232	39	aglE, ggtB; alpha-glucoside transport system substrate-binding protein
K16146	40	pep2; maltokinase [EC:2.7.1.175]
K08256	41	pimA; phosphatidyl-myo-inositol alpha-mannosyltransferase [EC:2.4.1.345]
K15526	42	mshC; L-cysteine:1D-myo-inositol 2-amino-2-deoxy-alpha-D-glucopyranoside ligase [EC:6.3.1.13]
K15521	43	mshA; D-inositol-3-phosphate glycosyltransferase [EC:2.4.1.250]
K07030	44	K07030; uncharacterized protein
K07077	45	K07077; uncharacterized protein
K03433	46	psmB, prcB; proteasome beta subunit [EC:3.4.25.1]
K14166	47	ycnJ; copper transport protein
K09118	48	K09118; uncharacterized protein
K07670	49	mtrA; two-component system, OmpR family, response regulator MtrA
K00038	50	E1.1.1.53; 3alpha(or 20beta)-hydroxysteroid dehydrogenase [EC:1.1.1.53]
K07284	51	srtA; sortase A [EC:3.4.22.70]
K13668	52	pimB; phosphatidyl-myo-inositol dimannoside synthase [EC:2.4.1.346]
K07005	53	K07005; uncharacterized protein
K06893	54	K06893; uncharacterized protein
K09772	55	sepF; cell division inhibitor SepF
K07341	56	doc; death on curing protein
K03891	57	qcrB; ubiquinol-cytochrome c reductase cytochrome b subunit
K07669	58	mprA; two-component system, OmpR family, response regulator MprA
K07131	59	K07131; uncharacterized protein
K03090	60	sigB; RNA polymerase sigma-B factor

## Sheet: 35-CR - 35-TR
KO_ID (35-CR – 35-TR)	Label	description
K03802	1	cphA; cyanophycin synthetase [EC:6.3.2.29 6.3.2.30]
K03863	2	vanB; vanillate monooxygenase ferredoxin subunit
K05874	3	tsr; methyl-accepting chemotaxis protein I, serine sensor receptor
K10001	4	gltI, aatJ; glutamate/aspartate transport system substrate-binding protein
K01725	5	cynS; cyanate lyase [EC:4.2.1.104]
K07000	6	K07000; uncharacterized protein
K01682	7	acnB; aconitate hydratase 2 / 2-methylisocitrate dehydratase [EC:4.2.1.3 4.2.1.99]
K17227	8	soxZ; sulfur-oxidizing protein SoxZ
K09472	9	puuC, aldH; 4-(gamma-glutamylamino)butanal dehydrogenase [EC:1.2.1.99]
K01708	10	garD; galactarate dehydratase [EC:4.2.1.42]
K03464	11	catC; muconolactone D-isomerase [EC:5.3.3.4]
K04100	12	ligA; protocatechuate 4,5-dioxygenase, alpha chain [EC:1.13.11.8]
K01075	13	E3.1.2.23; 4-hydroxybenzoyl-CoA thioesterase [EC:3.1.2.23]
K02688	14	prpR; transcriptional regulator, propionate catabolism operon regulatory protein
K07645	15	qseC; two-component system, OmpR family, sensor histidine kinase QseC [EC:2.7.13.3]
K12266	16	norR; anaerobic nitric oxide reductase transcription regulator
K05875	17	tar; methyl-accepting chemotaxis protein II, aspartate sensor receptor
K11712	18	dctR; two-component system, LuxR family, response regulator DctR
K11711	19	dctS; two-component system, LuxR family, sensor histidine kinase DctS [EC:2.7.13.3]
K03577	20	acrR, smeT; TetR/AcrR family transcriptional regulator, acrAB operon repressor
K12508	21	fcs; feruloyl-CoA synthase [EC:6.2.1.34]
K07130	22	kynB; arylformamidase [EC:3.5.1.9]
K19338	23	nac; LysR family transcriptional regulator, nitrogen assimilation regulatory protein
K03207	24	wcaH; colanic acid biosynthesis protein WcaH [EC:3.6.1.-]
K18954	25	pobR; AraC family transcriptional regulator, transcriptional activator of pobA
K12256	26	spuC; putrescine---pyruvate transaminase [EC:2.6.1.113]
K05596	27	iciA; LysR family transcriptional regulator, chromosome initiation inhibitor
K01046	28	lip, TGL2; triacylglycerol lipase [EC:3.1.1.3]
K06132	29	clsC; cardiolipin synthase C [EC:2.7.8.-]
K03776	30	aer; aerotaxis receptor
K07235	31	tusD, dsrE; tRNA 2-thiouridine synthesizing protein D [EC:2.8.1.-]
K11179	32	tusE, dsrC; tRNA 2-thiouridine synthesizing protein E [EC:2.8.1.-]
K15257	33	cmoB; tRNA (mo5U34)-methyltransferase [EC:2.1.1.-]
K07740	34	rsd; regulator of sigma D
K01573	35	oadG; oxaloacetate decarboxylase, gamma subunit [EC:4.1.1.3]
K09988	36	lyxA; D-lyxose ketol-isomerase [EC:5.3.1.15]
K11688	37	dctP; C4-dicarboxylate-binding protein DctP
K06957	38	tmcA; tRNA(Met) cytidine acetyltransferase [EC:2.3.1.193]
K07679	39	evgS, bvgS; two-component system, NarL family, sensor histidine kinase EvgS [EC:2.7.13.3]
K01572	40	oadB; oxaloacetate decarboxylase, beta subunit [EC:4.1.1.3]
K03803	41	rseC; sigma-E factor negative regulatory protein RseC
K03152	42	thiJ; protein deglycase [EC:3.5.1.124]
K07718	43	yesM; two-component system, sensor histidine kinase YesM [EC:2.7.13.3]
K07720	44	yesN; two-component system, response regulator YesN
K10938	45	acfC; accessory colonization factor AcfC
K11275	46	H1_5; histone H1/5
K05998	47	E3.4.21.100; pseudomonalisin [EC:3.4.21.100]
K19666	48	solR, cepR, tofR; LuxR family transcriptional regulator, quorum-sensing system regulator SolR
K13061	49	rhlI, phzI, solI, cepI, tofI; acyl homoserine lactone synthase [EC:2.3.1.184]
K17733	50	cwlK; peptidoglycan LD-endopeptidase CwlK [EC:3.4.-.-]
K13655	51	mqsA; HTH-type transcriptional regulator / antitoxin MqsA
K13651	52	mqsR; motility quorum-sensing regulator / GCU-specific mRNA interferase toxin
K19706	53	FAH; dihydroceramide fatty acyl 2-hydroxylase [EC:1.14.18.7]
K15540	54	ecpD; chaperone protein EcpD
K07345	55	fimA; major type 1 subunit fimbrin (pilin)
K09824	56	virK; uncharacterized protein
K06222	57	dkgB; 2,5-diketo-D-gluconate reductase B [EC:1.1.1.346]
K07687	58	rcsB; two-component system, NarL family, captular synthesis response regulator RcsB
K06518	59	cidA; holin-like protein

## Sheet: 42-CR – 42-TR
KO_ID (42-CR – 42-TR)	Label	description
K03802	1	cphA; cyanophycin synthetase [EC:6.3.2.29 6.3.2.30]
K03863	2	vanB; vanillate monooxygenase ferredoxin subunit
K05874	3	tsr; methyl-accepting chemotaxis protein I, serine sensor receptor
K10001	4	gltI, aatJ; glutamate/aspartate transport system substrate-binding protein
K03087	5	rpoS; RNA polymerase nonessential primary-like sigma factor
K01725	6	cynS; cyanate lyase [EC:4.2.1.104]
K07000	7	K07000; uncharacterized protein
K01682	8	acnB; aconitate hydratase 2 / 2-methylisocitrate dehydratase [EC:4.2.1.3 4.2.1.99]
K04100	9	ligA; protocatechuate 4,5-dioxygenase, alpha chain [EC:1.13.11.8]
K07645	10	qseC; two-component system, OmpR family, sensor histidine kinase QseC [EC:2.7.13.3]
K03464	11	catC; muconolactone D-isomerase [EC:5.3.3.4]
K17227	12	soxZ; sulfur-oxidizing protein SoxZ
K02688	13	prpR; transcriptional regulator, propionate catabolism operon regulatory protein
K07774	14	tctD; two-component system, OmpR family, response regulator TctD
K18954	15	pobR; AraC family transcriptional regulator, transcriptional activator of pobA
K12266	16	norR; anaerobic nitric oxide reductase transcription regulator
K18903	17	oprC, opcM; outer membrane protein, multidrug efflux system
K05875	18	tar; methyl-accepting chemotaxis protein II, aspartate sensor receptor
K07130	19	kynB; arylformamidase [EC:3.5.1.9]
K03577	20	acrR, smeT; TetR/AcrR family transcriptional regulator, acrAB operon repressor
K11712	21	dctR; two-component system, LuxR family, response regulator DctR
K11711	22	dctS; two-component system, LuxR family, sensor histidine kinase DctS [EC:2.7.13.3]
K05596	23	iciA; LysR family transcriptional regulator, chromosome initiation inhibitor
K09017	24	rutR; TetR/AcrR family transcriptional regulator
K01075	25	E3.1.2.23; 4-hydroxybenzoyl-CoA thioesterase [EC:3.1.2.23]
K12508	26	fcs; feruloyl-CoA synthase [EC:6.2.1.34]
K19338	27	nac; LysR family transcriptional regulator, nitrogen assimilation regulatory protein
K07168	28	K07168; CBS domain-containing membrane protein
K03207	29	wcaH; colanic acid biosynthesis protein WcaH [EC:3.6.1.-]
K02399	30	flgN; flagella synthesis protein FlgN
K06297	31	gerKC; spore germination protein KC
K06296	32	gerKB; spore germination protein KB
K06409	33	spoVB; stage V sporulation protein B
K10938	34	acfC; accessory colonization factor AcfC
K13655	35	mqsA; HTH-type transcriptional regulator / antitoxin MqsA
K13651	36	mqsR; motility quorum-sensing regulator / GCU-specific mRNA interferase toxin
K19706	37	FAH; dihydroceramide fatty acyl 2-hydroxylase [EC:1.14.18.7]
K19666	38	solR, cepR, tofR; LuxR family transcriptional regulator, quorum-sensing system regulator SolR
K13061	39	rhlI, phzI, solI, cepI, tofI; acyl homoserine lactone synthase [EC:2.3.1.184]
K11275	40	H1_5; histone H1/5
K05998	41	E3.4.21.100; pseudomonalisin [EC:3.4.21.100]
K17733	42	cwlK; peptidoglycan LD-endopeptidase CwlK [EC:3.4.-.-]
K01449	43	cwlJ, sleB; N-acetylmuramoyl-L-alanine amidase [EC:3.5.1.28]
K06295	44	gerKA; spore germination protein KA
K07493	45	K07493; putative transposase
K11915	46	stp1, pppA; serine/threonine protein phosphatase Stp1 [EC:3.1.3.16]
K11899	47	impD; type VI secretion system protein ImpD
K03502	48	umuC; DNA polymerase V
K15495	49	wtpA; molybdate/tungstate transport system substrate-binding protein
K13485	50	PRHOXNB, URAD; 2-oxo-4-hydroxy-4-carboxy-5-ureidoimidazoline decarboxylase [EC:4.1.1.97]
K14060	51	pinR; putative DNA-invertase from lambdoid prophage Rac
K08070	52	E1.3.1.74; 2-alkenal reductase [EC:1.3.1.74]
K03203	53	virB8, lvhB8; type IV secretion system protein VirB8
K15496	54	wtpB; molybdate/tungstate transport system permease protein
K01535	55	PMA1, PMA2; H+-transporting ATPase [EC:3.6.3.6]
K07720	56	yesN; two-component system, response regulator YesN
K07718	57	yesM; two-component system, sensor histidine kinase YesM [EC:2.7.13.3]
K06954	58	K06954; uncharacterized protein
K03194	59	virB1; type IV secretion system protein VirB1
K07481	60	K07481; transposase, IS5 family

## Sheet: CE – TE
KO_ID (CE – TE)	Label	description
K11624	1	ydfI; two-component system, NarL family, response regulator YdfI
K10622	2	cmtD, dhbB; HCOMODA/2-hydroxy-3-carboxy-muconic semialdehyde decarboxylase [EC:4.1.1.-]
K03329	3	yahN; amino acid exporter
K01161	4	E3.1.25.1; deoxyribonuclease (pyrimidine dimer) [EC:3.1.25.1]
K07339	5	hicA; mRNA interferase HicA [EC:3.1.-.-]
K10896	6	FANCM; fanconi anemia group M protein
K10848	7	ERCC4, XPF; DNA excision repair protein ERCC-4 [EC:3.1.-.-]
K06309	8	yfkT; spore germination protein
K05525	9	linC, CYP111A; linalool 8-monooxygenase [EC:1.14.13.151]
K01216	10	E3.2.1.73; licheninase [EC:3.2.1.73]
K12296	11	comX1_2; competence protein ComX
K08643	12	zmpB; zinc metalloprotease ZmpB [EC:3.4.24.-]
K17076	13	K17076, lysY; putative lysine transport system ATP-binding protein [EC:3.6.3.-]
K19002	14	mgs, bgsB; 1,2-diacylglycerol 3-alpha-glucosyltransferase [EC:2.4.1.337]
K17074	15	lysX2; putative lysine transport system permease protein
K15051	16	endA; DNA-entry nuclease
K13678	17	cpoA; 1,2-diacylglycerol-3-alpha-glucose alpha-1,2-galactosyltransferase [EC:2.4.1.-]
K12556	18	pbp2X; penicillin-binding protein 2X
K11041	19	eta; exfoliative toxin A/B
K03930	20	estA; putative tributyrin esterase [EC:3.1.1.-]
K02531	21	lacT; transcriptional antiterminator
K00687	22	pbp2B, penA; penicillin-binding protein 2B
K10682	23	saeR; two-component system, OmpR family, response regulator SaeR
K05363	24	murM; serine/alanine adding enzyme [EC:2.3.2.10]
K06608	25	iolR; DeoR family transcriptional regulator, myo-inositol catabolism operon repressor
K18770	26	pbpD; penicillin-binding protein 4 [EC:2.4.1.129 3.4.16.4]
K11615	27	malR; two-component system, CitB family, response regulator MalR
K03489	28	yydK; GntR family transcriptional regulator, transcriptional regulator of bglA
K18567	29	pbuE; MFS transporter, DHA1 family, purine base/nucleoside efflux pump
K11626	30	glnT; putative sodium/glutamine symporter
K11691	31	K11691, dctS; two-component system, CitB family, sensor histidine kinase DctS [EC:2.7.13.3]
K07717	32	ycbA, glnK; two-component system, sensor histidine kinase YcbA [EC:2.7.13.3]
K16199	33	dppE; dipeptide transport system substrate-binding protein
K11638	34	K11638, citT; two-component system, CitB family, response regulator CitT
K11637	35	citS; two-component system, CitB family, sensor histidine kinase CitS [EC:2.7.13.3]
K11630	36	bceR; two-component system, OmpR family, bacitracin resistance response regulator BceR
K11629	37	bceS; two-component system, OmpR family, bacitracin resistance sensor histidine kinase BceS [EC:2.7.13.3]
K16202	38	dppD; dipeptide transport system ATP-binding protein
K19548	39	bacC; dihydroanticapsin dehydrogenase [EC:1.1.1.385]
K03492	40	ydhQ; GntR family transcriptional regulator
K06342	41	cotX; spore coat protein X
K08317	42	ybdH; uncharacterized oxidoreductase [EC:1.1.-.-]
K15654	43	srfAA, lchAA; surfactin family lipopeptide synthetase A
K16200	44	dppB1; dipeptide transport system permease protein
K13727	45	pdc; phenolic acid decarboxylase [EC:4.1.1.-]
K16201	46	dppC; dipeptide transport system permease protein
K16963	47	yxeO; putative amino-acid transport system ATP-binding protein [EC:3.6.3.-]
K16962	48	yxeN; putative amino-acid transport system permease protein
K16961	49	yxeM; putative amino-acid transport system substrate-binding protein
K03623	50	yhcO; ribonuclease inhibitor
K02445	51	glpT; MFS transporter, OPA family, glycerol-3-phosphate transporter
K07149	52	K07149; uncharacterized protein
K16235	53	mmuP; S-methylmethionine transporter
K02205	54	rocE, rocC; arginine/ornithine permease

## Sheet: CR – TR
KO_ID (CR – TR)	Label	description
K03924	1	moxR; MoxR-like ATPase [EC:3.6.3.-]
K02652	2	pilB; type IV pilus assembly protein PilB
K02003	3	ABC.CD.A; putative ABC transport system ATP-binding protein
K01130	4	E3.1.6.1, aslA; arylsulfatase [EC:3.1.6.1]
K08884	5	K08884; serine/threonine protein kinase, bacterial [EC:2.7.11.1]
K02653	6	pilC; type IV pilus assembly protein PilC
K03086	7	rpoD; RNA polymerase primary sigma factor
K07114	8	yfbK; Ca-activated chloride channel homolog
K04771	9	degP, htrA; serine protease Do [EC:3.4.21.107]
K02454	10	gspE; general secretion pathway protein E
K06180	11	rluD; 23S rRNA pseudouridine1911/1915/1917 synthase [EC:5.4.99.23]
K04751	12	glnB; nitrogen regulatory protein P-II 1
K07263	13	pqqL; zinc protease [EC:3.4.24.-]
K02669	14	pilT; twitching motility protein PilT
K01953	15	asnB, ASNS; asparagine synthase (glutamine-hydrolysing) [EC:6.3.5.4]
K00342	16	nuoM; NADH-quinone oxidoreductase subunit M [EC:1.6.5.3]
K02372	17	fabZ; 3-hydroxyacyl-[acyl-carrier-protein] dehydratase [EC:4.2.1.59]
K05970	18	SIAE; sialate O-acetylesterase [EC:3.1.1.53]
K09810	19	lolD; lipoprotein-releasing system ATP-binding protein [EC:3.6.3.-]
K11927	20	rhlE; ATP-dependent RNA helicase RhlE [EC:3.6.4.13]
K00943	21	tmk, DTYMK; dTMP kinase [EC:2.7.4.9]
K07713	22	zraR, hydG; two-component system, NtrC family, response regulator HydG
K00850	23	pfkA, PFK; 6-phosphofructokinase 1 [EC:2.7.1.11]
K03734	24	apbE; FAD:protein FMN transferase [EC:2.7.1.180]
K07315	25	rsbU_P; phosphoserine phosphatase RsbU/P [EC:3.1.3.3]
K11996	26	MOCS3, UBA4; adenylyltransferase and sulfurtransferase [EC:2.7.7.80 2.8.1.11]
K11085	27	msbA; ATP-binding cassette, subfamily B, bacterial MsbA [EC:3.6.3.-]
K00330	28	nuoA; NADH-quinone oxidoreductase subunit A [EC:1.6.5.3]
K01885	29	EARS, gltX; glutamyl-tRNA synthetase [EC:6.1.1.17]
K00337	30	nuoH; NADH-quinone oxidoreductase subunit H [EC:1.6.5.3]
K02619	31	pabC; 4-amino-4-deoxychorismate lyase [EC:4.1.3.38]
K08177	32	oxlT; MFS transporter, OFA family, oxalate/formate antiporter
K00304	33	soxD; sarcosine oxidase, subunit delta [EC:1.5.3.1]
K00508	34	E1.14.19.3; linoleoyl-CoA desaturase [EC:1.14.19.3]
K11072	35	potA; spermidine/putrescine transport system ATP-binding protein [EC:3.6.3.31]
K10679	36	nfnB, nfsB; nitroreductase / dihydropteridine reductase [EC:1.-.-.- 1.5.1.34]
K15777	37	DOPA; 4,5-DOPA dioxygenase extradiol [EC:1.13.11.-]
K11071	38	potB; spermidine/putrescine transport system permease protein
K00819	39	rocD, OAT; ornithine--oxo-acid transaminase [EC:2.6.1.13]
K10009	40	ABC.CYST.P; cystine transport system permease protein
K06518	41	cidA; holin-like protein
K01734	42	mgsA; methylglyoxal synthase [EC:4.2.3.3]
K16937	43	doxD; thiosulfate dehydrogenase [quinone] large subunit [EC:1.8.5.2]
K01297	44	ldcA; muramoyltetrapeptide carboxypeptidase [EC:3.4.17.13]
K06917	45	selU; tRNA 2-selenouridine synthase [EC:2.9.1.-]
K15975	46	K15975; glyoxalase family protein
K07222	47	K07222; putative flavoprotein involved in K+ transport
K02424	48	fliY; cystine transport system substrate-binding protein
K05879	49	dhaL; phosphoenolpyruvate---glycerone phosphotransferase subunit DhaL [EC:2.7.1.121]
K05878	50	dhaK; phosphoenolpyruvate---glycerone phosphotransferase subunit DhaK [EC:2.7.1.121]
K01478	51	arcA; arginine deiminase [EC:3.5.3.6]
K03457	52	TC.NCS1; nucleobase:cation symporter-1, NCS1 family
K05710	53	hcaC; 3-phenylpropionate/trans-cinnamate dioxygenase ferredoxin component
K03758	54	arcD, lysl, lysP; arginine:ornithine antiporter / lysine permease
K02001	55	proW; glycine betaine/proline transport system permease protein
K02000	56	proV; glycine betaine/proline transport system ATP-binding protein [EC:3.6.3.32]
K00303	57	soxB; sarcosine oxidase, subunit beta [EC:1.5.3.1]
K02002	58	proX; glycine betaine/proline transport system substrate-binding protein
K03781	59	katE, CAT, catB, srpA; catalase [EC:1.11.1.6]
K01114	60	plc; phospholipase C [EC:3.1.4.3]
